# Supplementary material for: Contributions of microbial activity and ash deposition to post-fire nitrogen availability in a pine savanna
Source: Copernicus journal article supplement (doi:10.5194/bg-14-241-2017), 2017-01-17
Supplement: Supplementary file 1 [file bg-14-241-2017-supplement.pdf]

Supplement of Biogeosciences, 14, 241–255, 2017  
<http://www.biogeosciences.net/14/241/2017/>  
doi:10.5194/bg-14-241-2017-supplement  
© Author(s) 2017. CC Attribution 3.0 License.

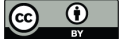

Biogeosciences  Open Access

*Supplement of*

## **Contributions of microbial activity and ash deposition to post-fire nitrogen availability in a pine savanna**

**Cari D. Ficken and Justin P. Wright**

*Correspondence to:* Cari D. Ficken ([cari.ficken@duke.edu](mailto:cari.ficken@duke.edu))

The copyright of individual parts of the supplement might differ from the CC-BY 3.0 licence.

|                 | Burned Sites |    |      |
|-----------------|--------------|----|------|
|                 | B1           | B2 | B3   |
| Minimum shift   | 8            | 3  | 11   |
| Empirical shift | 316          | 8  | -108 |

**Supplementary Table S1. The mass of N needed to be deposited at each site in order to achieve a shift in soil  $\delta^{15}\text{N}$  of the minimum external precision, and the observed empirical shift in soil  $\delta^{15}\text{N}$ . These values were calculated from mixing models with fresh leaf  $\delta^{15}\text{N}$  as one end member. Across 1,827 samples from 67 plant species, the mean  $\delta^{15}\text{N}$  was -2.9‰ ( $\pm 0.1$ ; J. Wright, unpublished data). Units are in  $\text{g N m}^{-2}$ . Minimum external precision is 0.1‰  $\delta^{15}\text{N}$  at 1 standard deviation.**
